# Supplementary material
Source: Elsevier journal article supplement (https://www.sciencedirect.com/science/article/pii/S030089322100172X)

# SUPPLEMENTARY DATA

**Table 1 of the supplementary data.** Number and percentage of participants by number of metrics of the cardiovascular health score in participants older than 55 years from the SUN project

| Number of metrics | Overall |       | Men |       | Women |       |
|-------------------|---------|-------|-----|-------|-------|-------|
|                   | No.     | %     | No. | %     | No.   | %     |
| 0                 | 0       | 0     | 0   | 0     | 0     | 0     |
| 1                 | 0       | 0     | 0   | 0     | 0     | 0     |
| 2                 | 1       | 0.11  | 1   | 0.16  | 0     | 0     |
| 3                 | 1       | 0.11  | 1   | 0.16  | 0     | 0     |
| 4                 | 2       | 0.23  | 1   | 0.16  | 1     | 0.41  |
| 5                 | 7       | 0.79  | 6   | 0.93  | 1     | 0.41  |
| 6                 | 25      | 2.82  | 24  | 3.72  | 1     | 0.41  |
| 7                 | 68      | 7.67  | 60  | 9.30  | 8     | 3.32  |
| 8                 | 105     | 11.85 | 86  | 13.33 | 19    | 7.88  |
| 9                 | 169     | 19.07 | 133 | 20.62 | 36    | 14.94 |
| 10                | 197     | 22.23 | 140 | 21.71 | 57    | 23.65 |
| 11                | 171     | 19.30 | 120 | 18.60 | 51    | 21.16 |
| 12                | 100     | 11.29 | 55  | 8.53  | 45    | 18.67 |
| 13                | 35      | 3.95  | 16  | 2.48  | 19    | 7.88  |
| 14                | 5       | 0.56  | 2   | 0.21  | 3     | 1.24  |
| Total             | 886     | 100   | 645 | 100   | 241   | 100   |

SUN, Seguimiento Universidad de Navarra.

**Table 2 of the supplementary data.** Number and percentage of participants for each Ideal Cardiovascular Health metric in participants older than 55 years from the SUN project

| CVH items                          | Overall |       | Men |       | Women |       |
|------------------------------------|---------|-------|-----|-------|-------|-------|
|                                    | No.     | %     | No. | %     | No.   | %     |
| Smoking                            | 294     | 33.18 | 159 | 24.65 | 135   | 56.02 |
| Physical activity, min/wk          | 773     | 87.25 | 565 | 87.60 | 208   | 86.31 |
| Diet (AHEI-2010)                   | 74      | 8.35  | 37  | 5.74  | 37    | 15.35 |
| Body mass index, kg/m <sup>2</sup> | 345     | 38.94 | 202 | 31.32 | 143   | 59.34 |
| Systolic blood pressure, mmHg      | 273     | 30.81 | 174 | 26.98 | 99    | 41.08 |
| Diastolic blood pressure, mmHg     | 569     | 64.22 | 397 | 61.55 | 172   | 71.37 |
| Fasting blood glucose, mg/dL       | 572     | 64.56 | 386 | 59.84 | 186   | 77.18 |
| Total cholesterol, mg/dL           | 455     | 51.35 | 371 | 57.52 | 84    | 34.85 |

AHEI, Alternative Healthy Eating Index; SUN, *Seguimiento Universidad de Navarra*.

**Table 3 of the supplementary data.** Risk for shorter telomeres (TL  $\leq$  20th percentile) according to 8 metrics of the cardiovascular health score in 886 participants older than 55 years from the SUN project

| OR (95%CI)                         |                  |                   |                    |                          |
|------------------------------------|------------------|-------------------|--------------------|--------------------------|
| <i>Metrics of CVH score</i>        | Intermediate     | Ideal             | <i>P for trend</i> |                          |
| Overall (n=886)                    |                  |                   |                    |                          |
| Smoking                            | 0.76 (0.48-1.23) | 0.60 (0.35-1.02)  | .132               |                          |
| Physical activity, min/wk          | 0.66 (0.14-3.06) | 0.54 (0.12-2.30)  | .298               |                          |
| Diet (AHEI-2010)                   | 0.69 (0.47-1.02) | 0.70 (0.35-1.41)  | .102               |                          |
| Body mass index, kg/m <sup>2</sup> | 0.85 (0.48-1.48) | 0.86 (0.48-1.55)  | .689               |                          |
| Systolic blood pressure, mmHg      | 1.04 (0.67-1.62) | 1.28 (0.78-2.09)  | .291               |                          |
| Diastolic blood pressure, mmHg     | 1.22 (0.61-2.47) | 1.26 (0.65-2.42)  | .590               |                          |
| Fasting blood glucose, mg/dL       | 0.84 (0.44-1.57) | 0.85 (0.46-1.54)  | .635               |                          |
| Total cholesterol, mg/dL           | 0.81 (0.47-1.40) | 0.85 (0.50-1.44)  | .736               |                          |
| <i>Men (n=645)</i>                 |                  |                   |                    | <i>P for interaction</i> |
| Smoking                            | 0.77 (0.46-1.28) | 0.58 (0.31-1.07)  | .171               | .982                     |
| Physical activity, min/week        | 0.44 (0.08-2.38) | 0.43 (0.09-2.10)  | .517               | .340                     |
| Diet (AHEI-2010)                   | 0.58 (0.38-0.89) | 0.52 (0.20-1.32)  | .015               | .158                     |
| Body mass index, kg/m <sup>2</sup> | 0.88 (0.48-1.61) | 0.95 (0.49-1.82)  | .952               | .792                     |
| Systolic blood pressure, mmHg      | 1.11 (0.68-1.80) | 1.12 (0.64-1.98)  | .695               | .498                     |
| Diastolic blood pressure, mmHg     | 1.50 (0.68-3.33) | 1.43 (0.67-3.03)  | .632               | .523                     |
| Fasting blood glucose, mg/dL       | 0.74 (0.38-1.45) | 0.78 (0.41-1.48)  | .528               | .386                     |
| Total cholesterol, mg/dL           | 0.83 (0.43-1.63) | 0.70 (0.37-1.33)  | .238               | .096                     |
| <i>Women (n=241)</i>               |                  |                   |                    |                          |
| Smoking                            | 0.77 (0.21-2.80) | 0.52 (0.15-1.88)  | .356               |                          |
| Physical activity, min/wk          | *                | *                 | -                  |                          |
| Diet (AHEI-2010)                   | 1.33 (0.41-4.31) | 1.59 (0.39-6.50)  | .524               |                          |
| Body mass index, kg/m <sup>2</sup> | 0.66 (0.15-2.98) | 0.66 (0.175-2.91) | .683               |                          |
| Systolic blood pressure, mmHg      | 0.77 (0.25-2.40) | 1.75 (0.59-5.21)  | .130               |                          |

|                                |                   |                   |      |  |
|--------------------------------|-------------------|-------------------|------|--|
| Diastolic blood pressure, mmHg | 0.52 (0.10-2.62)  | 0.84 (0.20-3.54)  | .655 |  |
| Fasting blood glucose, mg/dL   | 3.04 (0.30-30.97) | 2.65 (0.28-24.79) | .540 |  |
| Total cholesterol, mg/dL       | 0.52 (0.18-1.46)  | 1.54 (0.57-4.14)  | .153 |  |

Adjusted logistic regression models. Values are ORs (95%CI). Model adjusted for age at inclusion; age at saliva collection; sex; educational level (years at university, continuous); marital status (single, married, widower, divorced); family history of hypertension, diabetes, obesity, and cardiovascular disease (dichotomous); and prevalence of cancer and depression (dichotomous). The *P* for interaction was calculated using the likelihood ratio test for sex with each metric. AHEI, Alternative Healthy Eating Index; SUN, *Seguimiento Universidad de Navarra*. \*As the reference tertile (poor) had only 1 participant, we gathered 0 (poor) and 1 (intermediate) tertiles and considered them as the reference category. OR adjusted ideal physical activity for women was 0.71; 95%CI, 0.27-1.86 (*P* trend = .487).

**Table 4 of the supplementary data.** Multivariable linear regression analysis for telomere length with cardiovascular health score in participants older than 55 years from the SUN project

| CVH score                                 | $\beta$ coefficient | 95% Confidence Interval | P    | P for trend |                          |
|-------------------------------------------|---------------------|-------------------------|------|-------------|--------------------------|
| <b>Overall (n=886)</b>                    |                     |                         |      |             |                          |
| <sup>a</sup> Age- and sex-adjusted        |                     |                         |      | .528        |                          |
| Poor                                      | 0 (ref)             |                         |      |             |                          |
| Intermediate                              | -0.000              | -0.029-0.028            | .977 |             |                          |
| Ideal                                     | 0.016               | -0.024, 0.055           | .434 |             |                          |
| <sup>b</sup> Multivariable adjusted model |                     |                         |      | .359        |                          |
| Poor                                      | 0 (ref)             |                         |      |             |                          |
| Intermediate                              | 0.003               | -0.025-0.032            | .814 |             |                          |
| Ideal                                     | 0.021               | -0.019-0.060            | .307 |             |                          |
| <b>Men (n=645)</b>                        |                     |                         |      |             | <b>P for interaction</b> |
| <sup>a</sup> Age-adjusted                 |                     |                         |      | .164        | .0701                    |
| Poor                                      | 0 (ref)             |                         |      |             |                          |
| Intermediate                              | -0.006              | -0.036-0.023            | .679 |             |                          |
| Ideal                                     | 0.049               | 0.003-0.094             | .036 |             |                          |
| <sup>b</sup> Multivariable adjusted model |                     |                         |      | .141        | .0634                    |
| Poor                                      | 0 (ref)             |                         |      |             |                          |
| Intermediate                              | -0.007              | -0.036-0.023            | .659 |             |                          |
| Ideal                                     | 0.052               | 0.006-0.098             | .026 |             |                          |
| <b>Women (n=241)</b>                      |                     |                         |      |             |                          |
| <sup>a</sup> Age-adjusted                 |                     |                         |      | .559        |                          |
| Poor                                      | 0 (ref)             |                         |      |             |                          |
| Intermediate                              | 0.012               | -0.062-0.086            | .751 |             |                          |
| Ideal                                     | -0.024              | -0.106-0.058            | .568 |             |                          |
| <sup>b</sup> Multivariable adjusted model |                     |                         |      | .696        |                          |
| Poor                                      | 0 (ref)             |                         |      |             |                          |
| Intermediate                              | 0.024               | -0.049-0.097            | .516 |             |                          |
| Ideal                                     | -0.015              | -0.096-0.067            | .723 |             |                          |

SUN, Seguimiento Universidad de Navarra.

<sup>a</sup>Age at saliva collection.<sup>b</sup>Multivariable linear regression models additionally adjusted for age at inclusion; educational level (years at university, continuous); marital status (single, married, widowed, divorced); family history of

hypertension, diabetes, obesity and cardiovascular disease (dichotomous); and prevalence of cancer and depression (dichotomous). The *P* for interaction was calculated using the likelihood ratio test for sex with each model of cardiovascular health score.

**Table 5 of the supplementary data.** Multivariable linear regression for telomere length with cardiovascular health score in participants older than 55 years from the SUN project

|                                           | $\beta$<br>coefficient | Standard<br>error | 95%<br>confidence<br>interval | P    |
|-------------------------------------------|------------------------|-------------------|-------------------------------|------|
| Overall                                   |                        |                   |                               |      |
| Crude model                               | 0.005                  | 0.004             | -0.003-0.012                  | .208 |
| <sup>a</sup> Age-and sex-adjusted model   | 0.002                  | 0.004             | -0.006-0.009                  | .682 |
| *Multivariable-adjusted model             | 0.002                  | 0.004             | -0.005-0.010                  | .527 |
| Men                                       |                        |                   |                               |      |
| Crude model                               | 0.005                  | 0.004             | -0.003-0.013                  | .210 |
| Age-adjusted model                        | 0.004                  | 0.004             | -0.003-0.012                  | .274 |
| *Multivariable-adjusted model             | 0.005                  | 0.004             | -0.003-0.013                  | .240 |
| Women                                     |                        |                   |                               |      |
| Crude model                               | -0.009                 | 0.009             | -0.028-0.009                  | .305 |
| <sup>a</sup> Age-adjusted model           | -0.006                 | 0.009             | -0.025-0.012                  | .484 |
| <sup>b</sup> Multivariable-adjusted model | -0.006                 | 0.009             | -0.024-0.013                  | .555 |

<sup>a</sup>Age at saliva collection.

<sup>b</sup>Multivariable linear regression models additionally adjusted for age at inclusion; sex; educational level (years at university, continuous); marital status (single, married, widowed, divorced); family history of hypertension, diabetes, obesity, and cardiovascular disease (dichotomous); and prevalence of cancer and depression (dichotomous). P for interaction multivariable adjusted model: 0.3058.

SUN, *Seguimiento Universidad de Navarra*.

**Figure 1 of the supplementary data.** Flowchart of study participants.

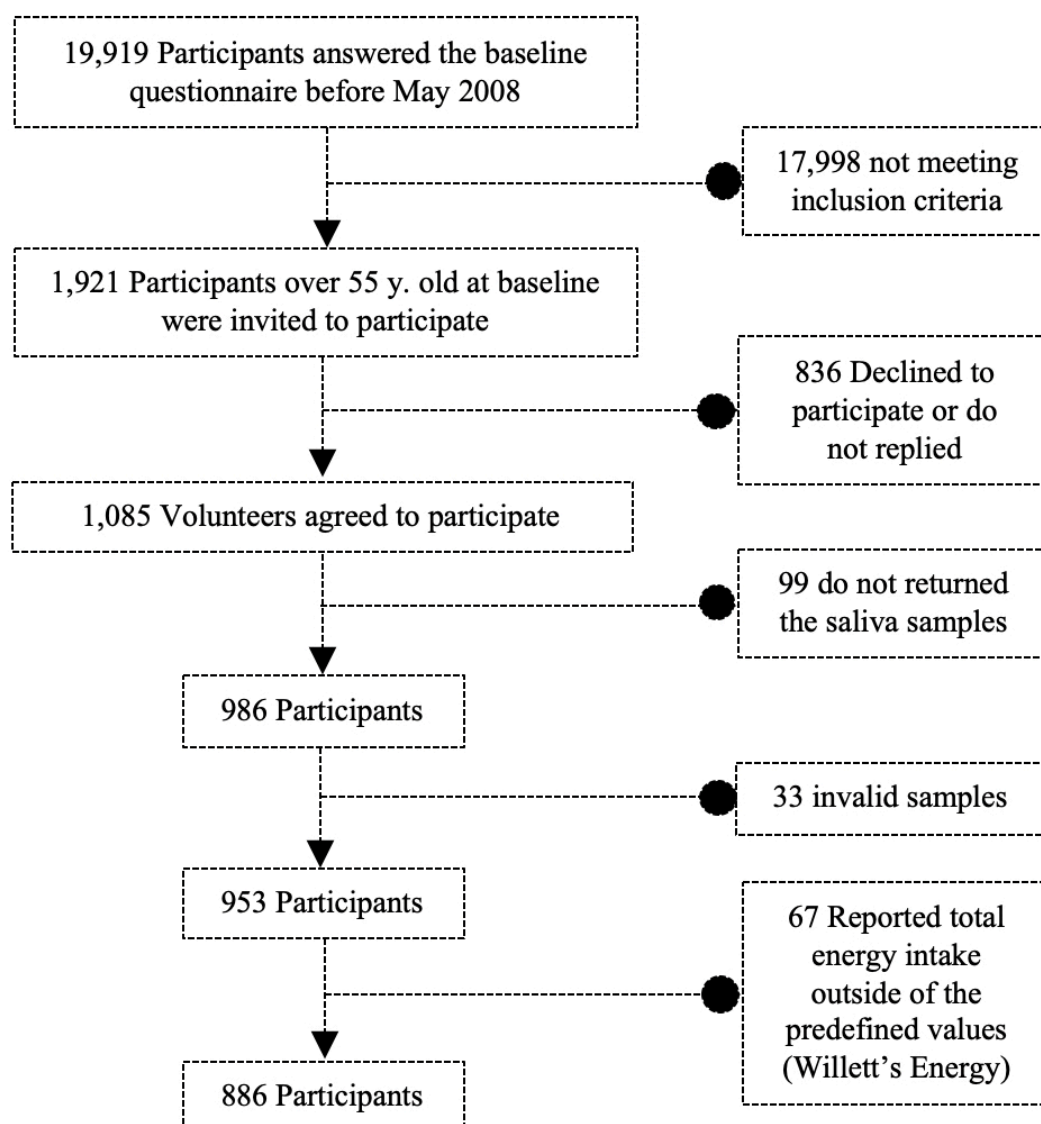



**Figure 2 of the supplementary data.** Correlation between telomere length and age.

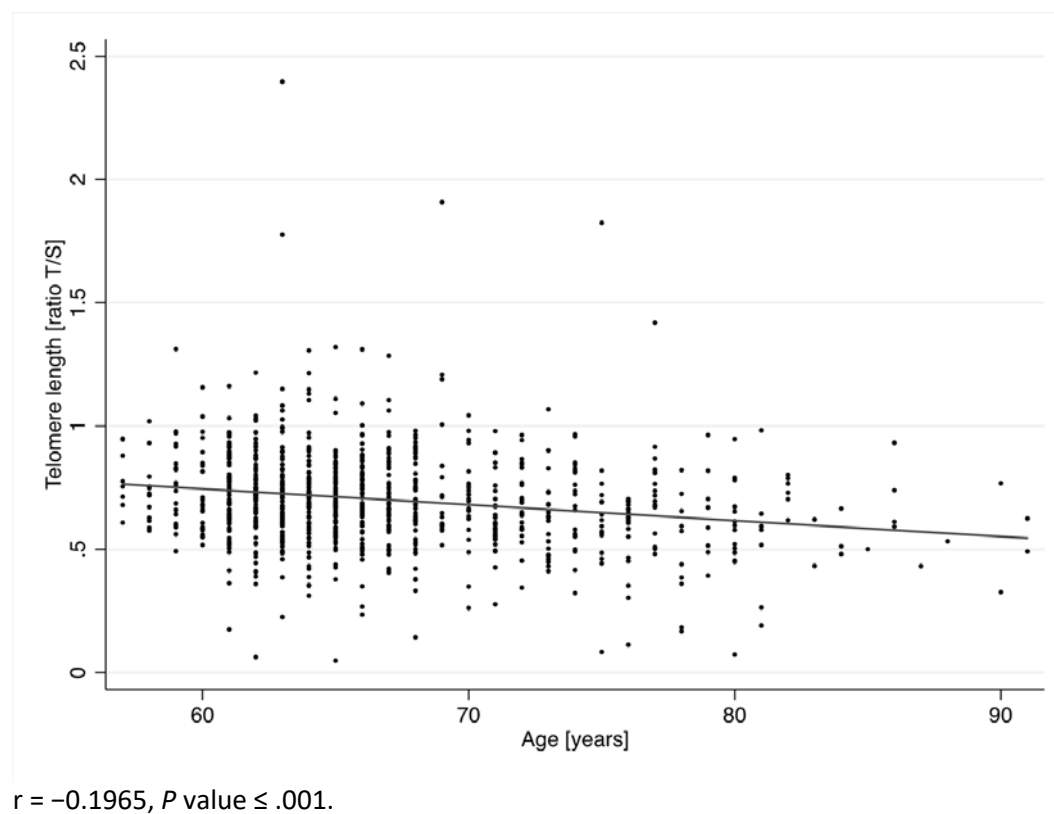

**Figure 3 of the supplementary data.** Correlation between telomere length and cardiovascular health score.

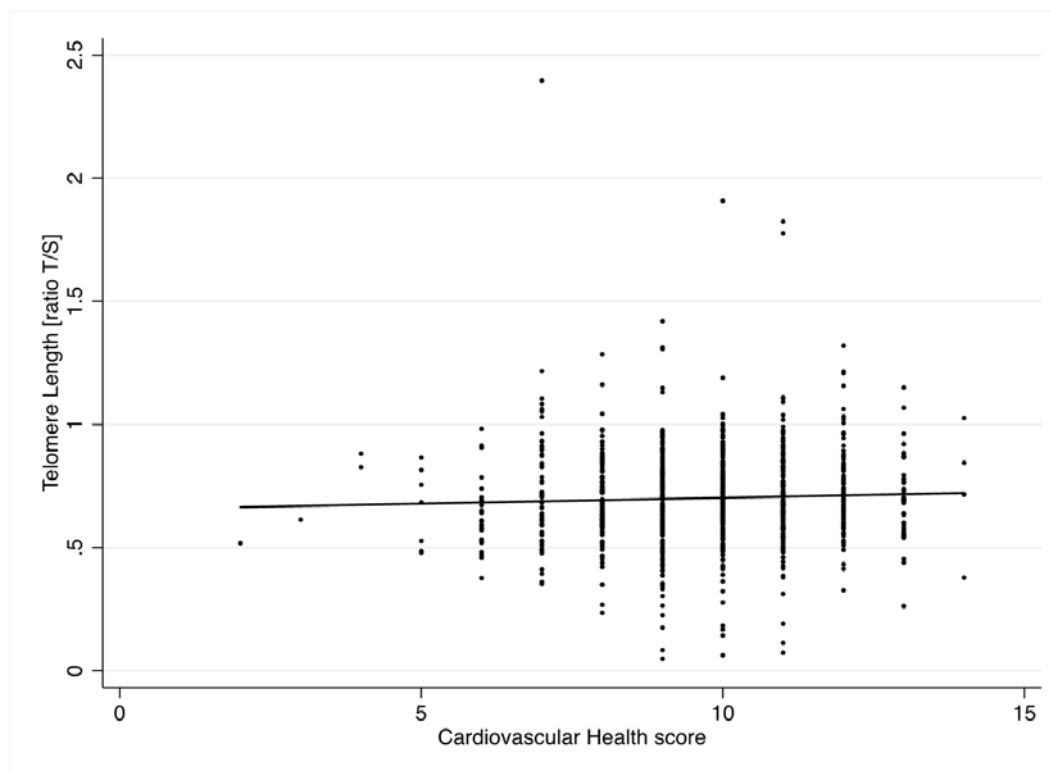

$r = 0.024$ ,  $P$  value = .2076.

**Figure 4 of the supplementary data.** Predicted (gray line) and observed marginal probabilities of having short telomeres ( $\leq 20$  percentile) according to the number of metrics of the cardiovascular health score.

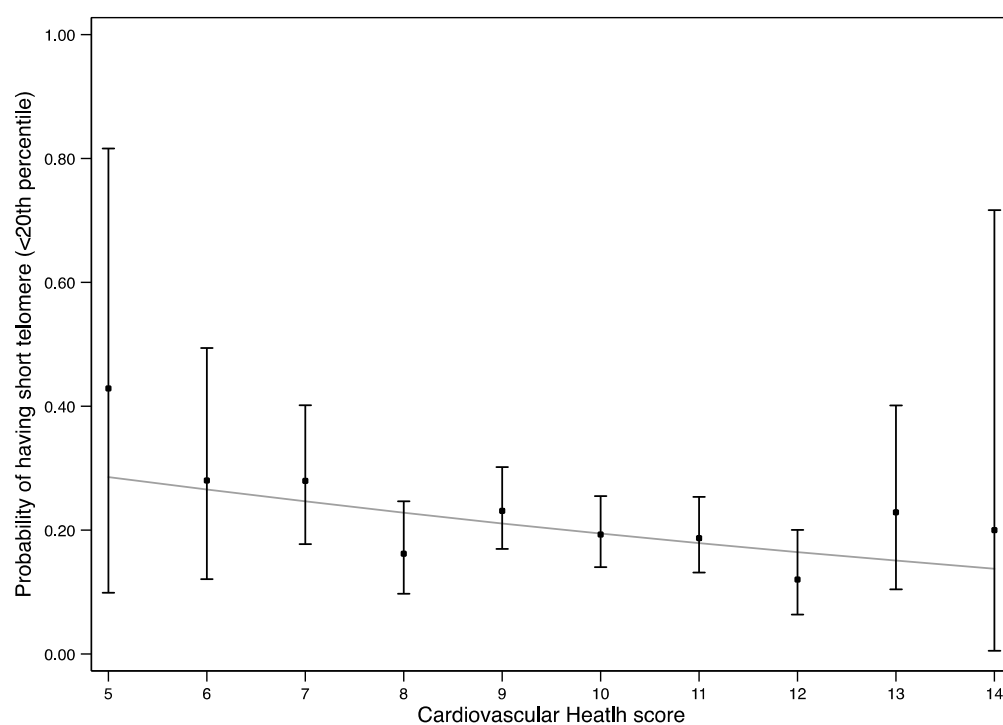

Supplement: mmc1 [file S030089322100172X:mmc1.pdf]
